# Supplementary material for: Microplastic Index—How to Predict Microplastics Formation?
Source: MDPI journal article supplement (doi:10.3390/polym15092185), 2023-05-04
Supplement: s1 [file s1]

# Supplementary Materials: Microplastic Index – how to predict microplastics formation?

Arjen Boersma<sup>1,\*</sup>, Kalouda Grigoriadi <sup>1</sup>, Merel G. A. Nooijens <sup>1</sup>, Sieger Henke<sup>2</sup>, Ingeborg M. Kooter<sup>2</sup>, Luke A. Parker<sup>2</sup>, Ardi Dortmans<sup>2</sup> and Jan Harm Urbanus<sup>2</sup>

**Table S1.** Literature values for the Critical stress intensity factors of 14 polymers.

| Polymer   | Range   | K <sub>IC</sub> (MPa√m) | REF        |
|-----------|---------|-------------------------|------------|
| HDPE      | Low     | 1.4                     | [52]       |
|           | High    | 5.9                     | [53]       |
|           | Average | 3.6                     | [54], [55] |
| LDPE      | Low     | 0.8                     |            |
|           | High    | 1.7                     | [56]       |
|           | Average | 1.2                     | [57]       |
| PP        | Low     | 1.7                     | [58]       |
|           | High    | 3.9                     | [59]       |
|           | Average | 2.6                     | [60]       |
| PET       | Low     | 2                       | [61]       |
|           | High    | 5.4                     | [59]       |
|           | Average | 5.0                     | [62]       |
| PETG      | Low     | 1.8                     | [63]       |
|           | High    | 2.5                     |            |
|           | Average | 2.3                     |            |
| Nylon 6   | Low     | 3.3                     | [64]       |
|           | High    | 5.5                     | [65]       |
|           | Average | 4.9                     |            |
| Nylon 6.6 | Low     | 2.5                     | [59]       |
|           | High    | 3.9                     | [66]       |
|           | Average | 3.1                     |            |
| PVC       | Low     | 2.0                     | [59]       |
|           | High    | 4.0                     | [55]       |
|           | Average | 2.4                     | [67], [61] |
| PMMA      | Low     | 0.7                     | [59]       |
|           | High    | 1.6                     | [66]       |
|           | Average | 1.1                     |            |
| PS        | Low     | 0.7                     | [59]       |
|           | High    | 1.5                     | [67]       |
|           | Average | 0.9                     |            |
| HIPS      | Low     | 1.0                     | [68]       |
|           | High    | 1.5                     | [69]       |
|           | Average | 0.9                     |            |
| PC        | Low     | 3.0                     | [59], [67] |
|           | High    | 5.1                     | [70]       |
|           | Average | 3.7                     | [66], [71] |
| ABS       | Low     | 2.5                     | [72]       |
|           | High    | 3.1                     | [73]       |
|           | Average | 2.9                     |            |
| POM       | Low     | 4.4                     | [74]       |

|  |         |     |      |
|--|---------|-----|------|
|  | High    | 5.8 | [75] |
|  | Average | 5.5 |      |

**Table S2.** literature data for the specific wear rate of several polymers.

| Polymer | $\sigma_{U,EU}$ (MPa.%)<br>REF [79] | k (mm <sup>3</sup> /N.m)<br>REF [79] | $\sigma_{U,EU}$ (MPa.%)<br>REF [80] | k (mm <sup>3</sup> /N.m)<br>REF [80] | $\sigma_{U,EU}$ (MPa.%)<br>REF [81] | k (mm <sup>3</sup> /N.m)<br>REF [81] |
|---------|-------------------------------------|--------------------------------------|-------------------------------------|--------------------------------------|-------------------------------------|--------------------------------------|
| PETG    | 27                                  | 0.0085                               |                                     |                                      |                                     |                                      |
| PMMA    | 2.8                                 | 0.026                                |                                     |                                      |                                     |                                      |
| PP      | 40                                  | 0.0085                               |                                     |                                      |                                     |                                      |
| PS      | 2.8                                 | 0.018                                |                                     |                                      |                                     |                                      |
| PVC     | 9.9                                 | 0.010                                |                                     |                                      |                                     |                                      |
| PS      |                                     |                                      | 2.3                                 | 0.019                                |                                     |                                      |
| PMMA    |                                     |                                      | 6.1                                 | 0.013                                |                                     |                                      |
| POM     |                                     |                                      | 27                                  | 0.0031                               |                                     |                                      |
| PP      |                                     |                                      | 76                                  | 0.0012                               |                                     |                                      |
| PTFE    |                                     |                                      | 57                                  | 0.0010                               |                                     |                                      |
| Nylon66 |                                     |                                      | 77                                  | 0.0017                               |                                     |                                      |
| HDPE    |                                     |                                      | 119                                 | 0.0003                               |                                     |                                      |
| PMMA    |                                     |                                      |                                     |                                      | 6                                   | 0.020                                |
| LDPE    |                                     |                                      |                                     |                                      | 256                                 | 0.0004                               |
| PS      |                                     |                                      |                                     |                                      | 2.3                                 | 0.018                                |
| POM     |                                     |                                      |                                     |                                      | 23                                  | 0.0035                               |
| Nylon66 |                                     |                                      |                                     |                                      | 60                                  | 0.0017                               |
| PP      |                                     |                                      |                                     |                                      | 69                                  | 0.0014                               |
| PTFE    |                                     |                                      |                                     |                                      | 64                                  | 0.0011                               |
| PET     |                                     |                                      |                                     |                                      | 1.8                                 | 0.015                                |
| PC      |                                     |                                      |                                     |                                      | 8.2                                 | 0.0067                               |
| ABS     |                                     |                                      |                                     |                                      | 6.4                                 | 0.016                                |
| PVC     |                                     |                                      |                                     |                                      | 1.1                                 | 0.025                                |
| Nylon6  |                                     |                                      |                                     |                                      | 47                                  | 0.0029                               |

These values are derived from the graphs found in the literature, which may introduce a small error.

**Table S3.** Mechanical and physical properties of 14 polymers derived from [49,50,51].

| Polymer | Range   | E<br>(GPa) | H<br>(MPa) | $\sigma_Y$<br>(MPa) | $\sigma_U$<br>(MPa) | $\sigma_{s^*}$<br>(MPa) | $\epsilon_U$<br>(%) | $C_N$<br>(J/cm <sup>2</sup> ) | $\nu$ | $\mu$ | $\gamma$<br>(mN/m) |
|---------|---------|------------|------------|---------------------|---------------------|-------------------------|---------------------|-------------------------------|-------|-------|--------------------|
| HDPE    | Low     | 0.49       | 42         | 8                   | 17                  | 9                       | 120                 | 0.4                           | 0.42  | 0.22  | 33                 |
|         | High    | 1.53       | 58         | 40                  | 44                  | 17                      | 1867                | 5.3                           | 0.46  | 0.29  | 36.8               |
|         | Average | 1.04       | 49         | 26                  | 26                  | 13                      | 638                 | 2.0                           | 0.44  | 0.27  | 35.7               |
| LDPE    | Low     | 0.15       | 13         | 8                   | 9                   | 4                       | 98                  | 0.3                           | 0.42  | 0.35  | 31                 |
|         | High    | 0.41       | 16         | 21                  | 36                  | 10                      | 783                 | 1.7                           | 0.44  | 0.65  | 35.3               |
|         | Average | 0.24       | 15         | 11                  | 12                  | 7                       | 400                 | 0.9                           | 0.43  | 0.46  | 33.7               |
| PP      | Low     | 0.75       | 56         | 19                  | 13                  | 11                      | 8                   | 1.1                           | 0.43  | 0.20  | 29.4               |
|         | High    | 2.49       | 80         | 43                  | 57                  | 24                      | 725                 | 2.9                           | 0.43  | 0.30  | 32                 |
|         | Average | 1.47       | 68         | 32                  | 38                  | 17                      | 188                 | 3.6                           | 0.43  | 0.25  | 29.6               |
| PET     | Low     | 1.57       | 117        | 30                  | 22                  | 23                      | 1                   | 0.2                           | 0.43  | 0.20  | 40                 |
|         | High    | 5.20       | 170        | 90                  | 95                  | 51                      | 600                 | 1.4                           | 0.43  | 0.30  | 44.6               |
|         | Average | 3.29       | 154        | 73                  | 50                  | 35                      | 70                  | 0.5                           | 0.43  | 0.23  | 43                 |
| PETG    | Low     | 1.60       | 104        | 32                  | 20                  | 19                      | 3                   | 0.2                           | 0.38  | 0.18  | 30                 |
|         | High    | 4.20       | 121        | 59                  | 100                 | 39                      | 360                 | 1.0                           | 0.38  | 0.32  | 30                 |
|         | Average | 3.03       | 110        | 51                  | 45                  | 31                      | 123                 | 0.7                           | 0.38  | 0.28  | 30                 |
| Nylon 6 | Low     | 1.10       | 90         | 38                  | 44                  | 27                      | 3                   | 0.4                           | 0.23  | 0.30  | 40                 |
|         | High    | 3.75       | 150        | 93                  | 96                  | 90                      | 358                 | 2.5                           | 0.45  | 0.60  | 47                 |
|         | Average | 2.45       | 103        | 64                  | 70                  | 57                      | 71                  | 2.3                           | 0.35  | 0.55  | 42                 |
|         | Low     | 1.50       | 70         | 64                  | 5                   | 19                      | 21                  | 0.5                           | 0.32  | 0.28  | 39.3               |

|           |         |      |     |     |     |     |     |     |      |      |      |
|-----------|---------|------|-----|-----|-----|-----|-----|-----|------|------|------|
| Nylon 6.6 | High    | 1.85 | 180 | 91  | 138 | 50  | 210 | 2.3 | 0.42 | 0.28 | 46   |
|           | Average | 3.49 | 139 | 73  | 80  | 42  | 52  | 1.3 | 0.40 | 0.30 | 42   |
| PVC       | Low     | 1.82 | 75  | 22  | 8   | 23  | 3   | 0.4 | 0.40 | 0.30 | 39   |
|           | High    | 4.04 | 130 | 55  | 57  | 52  | 465 | 0.5 | 0.40 | 0.40 | 41.5 |
|           | Average | 2.70 | 109 | 45  | 21  | 35  | 254 | 0.5 | 0.40 | 0.32 | 40.3 |
| PMMA      | Low     | 1.86 | 173 | 55  | 46  | 78  | 3   | 0.2 | 0.37 | 0.45 | 39   |
|           | High    | 3.30 | 88  | 84  | 79  | 70  | 33  | 0.5 | 0.40 | 0.80 | 41.1 |
|           | Average | 2.91 | 171 | 64  | 64  | 100 | 10  | 0.3 | 0.39 | 0.58 | 40.2 |
| PS        | Low     | 2.12 | 60  | 20  | 26  | 25  | 1   | 0.2 | 0.34 | 0.42 | 36   |
|           | High    | 3.48 | 155 | 56  | 56  | 71  | 70  | 0.8 | 0.34 | 0.46 | 42   |
|           | Average | 2.94 | 133 | 36  | 41  | 57  | 12  | 0.4 | 0.34 | 0.43 | 40.7 |
| HIPS      | Low     | 0.75 | 60  | 30  | 12  | 24  | 1   | 0.1 | 0.41 | 0.40 | 36   |
|           | High    | 3.47 | 110 | 50  | 240 | 44  | 350 | 5.0 | 0.41 | 0.40 | 42   |
|           | Average | 1.99 | 81  | 26  | 27  | 33  | 45  | 1.0 | 0.41 | 0.40 | 40.7 |
| PC        | Low     | 1.80 | 99  | 40  | 29  | 20  | 7   | 0.6 | 0.34 | 0.20 | 42.9 |
|           | High    | 3.24 | 125 | 112 | 90  | 46  | 186 | 8.9 | 0.38 | 0.37 | 45   |
|           | Average | 2.38 | 115 | 62  | 65  | 29  | 87  | 4.8 | 0.35 | 0.25 | 43.5 |
| ABS       | Low     | 1.40 | 68  | 34  | 12  | 20  | 2   | 0.4 | 0.36 | 0.30 | 38.5 |
|           | High    | 2.83 | 115 | 65  | 74  | 55  | 130 | 9.5 | 0.38 | 0.48 | 38.5 |
|           | Average | 2.30 | 100 | 45  | 40  | 34  | 33  | 2.0 | 0.36 | 0.34 | 38.5 |
| POM       | Low     | 1.93 | 150 | 45  | 45  | 38  | 2   | 0.4 | 0.37 | 0.25 | 38   |
|           | High    | 3.72 | 175 | 90  | 76  | 53  | 110 | 1.6 | 0.37 | 0.30 | 45   |
|           | Average | 3.01 | 161 | 67  | 63  | 43  | 37  | 0.9 | 0.37 | 0.27 | 41.5 |

\* Calculated from other parameters

Number of data points taken from the literature [49,50,51] to calculate the minimum, maximum and average values for the properties listed in the table above.

| Range     | E<br>(GPa) | H<br>(MPa) | $\sigma_Y$<br>(MPa) | $\sigma_U$<br>(MPa) | $\epsilon_U$<br>(%) | $C_N$<br>(J/cm <sup>2</sup> ) | $\nu$ | $\mu$ | $\gamma$<br>(mN/m) |
|-----------|------------|------------|---------------------|---------------------|---------------------|-------------------------------|-------|-------|--------------------|
| HDPE      | 171        | 42         | 904                 | 408                 | 759                 | 78                            | 3     | 12    | 3                  |
| LDPE      | 194        | 3          | 314                 | 323                 | 362                 | 3                             | 2     | 214   | 2                  |
| PP        | 115        | 68         | 1402                | 292                 | 566                 | 76                            | 1     | 32    | 3                  |
| PET       | 56         | 9          | 46                  | 35                  | 61                  | 26                            | 1     | 12    | 2                  |
| PETG      | 39         | 3          | 48                  | 62                  | 64                  | 17                            | 1     | 3     | 1                  |
| Nylon 6   | 509        | 88         | 497                 | 324                 | 659                 | 380                           | 7     | 78    | 2                  |
| Nylon 6.6 | 335        | 13         | 307                 | 294                 | 437                 | 290                           | 48    | 19    | 2                  |
| PVC       | 425        | 4          | 623                 | 1194                | 1243                | 9                             | 1     | 4     | 3                  |
| PMMA      | 277        | 32         | 72                  | 289                 | 339                 | 83                            | 9     | 6     | 2                  |
| PS        | 159        | 18         | 149                 | 168                 | 228                 | 37                            | 1     | 3     | 3                  |
| HIPS      | 289        | 24         | 376                 | 268                 | 436                 | 83                            | 1     | 1     | 2                  |
| PC        | 484        | 84         | 679                 | 391                 | 653                 | 213                           | 9     | 7     | 2                  |
| ABS       | 416        | 79         | 774                 | 385                 | 607                 | 340                           | 5     | 2     | 1                  |
| POM       | 82         | 5          | 103                 | 40                  | 126                 | 64                            | 21    | 15    | 2                  |

**Table S4.** Global composition of microplastics in marine environments (in %).

|                   | REF<br>[95]**<br>Global<br>2012 | REF<br>[96]**<br>Global<br>Beach<br>2022 | REF<br>[96]**<br>Global<br>Water<br>2022 | REF<br>[96]**<br>Global<br>Sediment<br>2022 | REF<br>[97]**<br>Africa<br>2021 | REF [98]<br>Global<br>2022 | REF [99]<br>Pacific<br>2020 | REF<br>[100]<br>Mariana<br>Trench<br>2018 | REF<br>[101]<br>Polar<br>sea<br>2021 | Average |
|-------------------|---------------------------------|------------------------------------------|------------------------------------------|---------------------------------------------|---------------------------------|----------------------------|-----------------------------|-------------------------------------------|--------------------------------------|---------|
| Number of studies | 68                              | 30                                       | 55                                       | 26                                          | 34                              | 11                         | 18                          | 3                                         | 2                                    |         |
| HDPE              | 11.9                            | 7.5                                      | 6.4                                      | 6.0                                         | 8.3                             | 5.6                        | 6.3                         |                                           | 4.6                                  | 7.6     |
| LDPE              | 17.9                            | 11.3                                     | 9.6                                      | 8.9                                         | 12.5                            | 8.4                        | 9.4                         |                                           | 6.9                                  | 11.4    |

|         |                                                                   |      |      |      |      |      |      |      |      |      |
|---------|-------------------------------------------------------------------|------|------|------|------|------|------|------|------|------|
| PP      | 24.2                                                              | 19.5 | 15.6 | 14.9 | 18.2 | 10.8 | 39.1 | 1.7  | 4.5  | 18.4 |
| PET     | 4.5                                                               | 10.1 | 10.5 | 9.9  | 10.4 | 26.0 | 14.2 | 14.4 | 32.5 | 9.2  |
| PETG    | PETG microplastics cannot be distinguished from PET microplastics |      |      |      |      |      |      |      |      |      |
| Nylon6  | 4.2                                                               | 7.2  | 7.7  | 6.0  | 4.3  | 6.1  |      | 7.1  | 2.3  | 5.3  |
| Nylon66 | 2.2                                                               | 3.7  | 3.9  | 3.1  | 2.2  | 3.1  |      | 3.7  | 1.2  | 2.7  |
| PVC     | 9.4                                                               | 10.1 | 9.1  | 10.8 | 7.8  | 6.0  |      | 22.4 | 9.5  | 8.6  |
| PMMA    | 5.7                                                               |      | 7.6  | 7.4  | 3.9  | 11.8 | 16.2 |      | 10.0 | 6.8  |
| PS      | 15.1                                                              | 12.3 | 9.8  | 11.6 | 18.2 | 7.0  | 5.3  | 13.1 | 6.0  | 11.5 |
| HIPS    | HIPS microplastics cannot be distinguished from PS microplastics  |      |      |      |      |      |      |      |      |      |
| PC      |                                                                   | 0.7  | 0.4  |      |      | 1.3  |      |      | 1.0  | 0.5  |
| ABS     |                                                                   | 2.9  | 1.5  | 2.5  | 2.6  |      |      | 4.1  | 3.0  | 2.1  |
| POM     | 0.8                                                               | 0.0  |      |      |      |      |      |      | 1.0  | 0.3  |
| PUR     | 0.4                                                               | 2.9  | 3.6  | 2.5  | 1.3  | 4.5  |      | 11.7 | 5.5  | 2.1  |
| PEST    |                                                                   | 5.8  | 7.3  | 9.9  | 2.6  |      |      | 8.1  |      | 5.9  |
| Rest    | 3.7                                                               | 6.0  | 7.0  | 6.5  | 7.7  | 9.4  | 9.5  | 13.7 | 12.0 | 7.6  |

\*\* The microplastics in these papers are not presented as concentrations of the total, but as number of papers in which the specific polymer is found. This data is converted to percentages by dividing the number of papers having microplastics of the specific polymer by the total number of papers that contain all microplastics.

**Table S5.** Global composition of microplastics in fresh water environments (rivers and lakes, in %).

|                   | REF [102]<br>Developed<br>countries<br>2020 | REF [102]<br>Developing<br>countries<br>2020 | REF [103]<br>Global<br>2020 | REF [9]**<br>Global<br>2019 | REF [104]<br>Global<br>Water<br>2021 | REF [104]<br>Global<br>Sediment<br>2021 | REF[105]<br>Switzerland | Average |
|-------------------|---------------------------------------------|----------------------------------------------|-----------------------------|-----------------------------|--------------------------------------|-----------------------------------------|-------------------------|---------|
| Number of studies | 18                                          | 19                                           | 28                          | 32                          | 127                                  | 107                                     | 5                       |         |
| HDPE              | 16.3                                        | 7.8                                          | 9.6                         | 7.1                         | 8.3                                  | 8.3                                     | 12.3                    | 8.3     |
| LDPE              | 24.5                                        | 11.8                                         | 14.4                        | 10.6                        | 12.5                                 | 12.5                                    | 17.7                    | 12.5    |
| PP                | 17.7                                        | 23.6                                         | 24                          | 16.4                        | 18.2                                 | 15.9                                    | 21.2                    | 17.2    |
| PET               | 3.5                                         | 29.8                                         | 11                          | 8.2                         | 19.2                                 | 2.2                                     | 8.4                     | 11.1    |
| PETG              |                                             |                                              |                             |                             |                                      |                                         |                         | -       |
| Nylon6            |                                             | 4.4                                          | 4.0                         | 5.0                         | 4.9                                  | 9.0                                     | 7.1                     | 5.9     |
| Nylon66           |                                             | 2.2                                          | 2.0                         | 2.6                         | 2.5                                  | 4.7                                     | 3.7                     | 3.0     |
| PVC               | 4.0                                         | 1.7                                          | 1                           | 8.9                         | 14.0                                 | 3.4                                     | 14.3                    | 7.4     |
| PMMA              |                                             |                                              |                             | 3.1                         | 0.8                                  | 6.8                                     | 4.1                     | 3.3     |
| PS                | 13.9                                        | 9.1                                          | 13                          | 12.0                        | 14.0                                 | 7.9                                     | 3.1                     | 10.8    |
| HIPS              |                                             |                                              |                             |                             |                                      |                                         |                         | -       |
| PC                |                                             |                                              |                             | 0.6                         |                                      |                                         | 1.2                     | 0.7     |
| ABS               | 2.0                                         |                                              |                             | 1.9                         |                                      |                                         | 2.4                     | 1.9     |
| POM               |                                             |                                              |                             |                             |                                      |                                         |                         | 0.0     |
| PUR               | 0.9                                         |                                              | 1.0                         | 2.5                         | 0.5                                  | 6.8                                     | 4.6                     | 2.8     |
| PEST              | 1.8                                         | 2.3                                          |                             | 15.9                        | 1.9                                  | 10.3                                    |                         | 6.0     |
| Rest              | 15.4                                        | 7.3                                          | 20                          | 5.2                         | 3.2                                  | 12.2                                    | 0                       | 9.1     |

**Table S6.** Global composition of microplastics in air (in %).

|                   | REF [106]<br>Asia<br>2022 | REF [106]<br>Europe<br>2022 | REF [107]<br>Atlantic<br>coast<br>2020 | REF [108]**<br>Global<br>Outdoor<br>2021 | REF [108]**<br>Global<br>Indoor<br>2021 | REF [109]*<br>Global<br>2022 | Average |
|-------------------|---------------------------|-----------------------------|----------------------------------------|------------------------------------------|-----------------------------------------|------------------------------|---------|
| Number of studies | 8                         | 6                           | 4                                      | 27                                       | 8                                       | 18                           |         |

|         |      |      |      |      |      |      |      |
|---------|------|------|------|------|------|------|------|
| HDPE    | 5.3  | 3.9  | 25.5 | 5.7  | 5.3  | 5.8  | 6.3  |
| LDPE    | 7.9  | 5.8  | 38.2 | 8.5  | 8    | 8.8  | 9.4  |
| PP      | 9.4  | 6.9  | 5.4  | 10.8 | 16.7 | 14.6 | 11.1 |
| PET     | 34.0 | 20.3 | 9.6  | 8.3  | 13.3 | 15.6 | 14.0 |
| PETG    |      |      |      |      |      |      | -    |
| Nylon6  | 9.0  | 6.5  |      | 5.5  | 8.8  | 6.2  | 6.3  |
| Nylon66 | 4.6  | 3.3  |      | 2.8  | 4.5  | 3.2  | 3.2  |
| PVC     | 11.7 | 7.2  | 9.5  | 7.5  | 6.7  | 3.1  | 6.5  |
| PMMA    |      |      |      | 3.3  | 3.3  | 1.0  | 2.4  |
| PS      | 7.2  | 21.1 | 11.8 | 11.7 | 10   | 5.2  | 9.7  |
| HIPS    |      |      |      |      |      |      | -    |
| PC      |      |      |      | 0.8  | 6.7  | 2.1  | 2.0  |
| ABS     |      |      |      |      |      |      | -    |
| POM     |      |      |      |      |      |      | -    |
| PUR     | 1.2  |      |      | 0.8  |      | 2.1  | 1.3  |
| PEST    |      |      |      | 10   | 10   | 3.1  | 7.3  |
| Rest    | 9.7  | 25.0 | 0    | 24.3 | 6.7  | 29.2 | 16.5 |

Table S7. Global production of plastics (Mton/year).

|         | 1990 | 1995 | 2000                          | 2005 | 2010 | 2015 | 2020 | Total* | %    | REF  |
|---------|------|------|-------------------------------|------|------|------|------|--------|------|------|
| HDPE    | 17.3 | 22.3 | 30.0                          | 35.9 | 43.6 | 51.6 | 59.6 | 260    | 15.5 | [86] |
| LDPE    | 19.5 | 26.3 | 35.2                          | 45.7 | 52.2 | 63.7 | 73.0 | 316    | 18.7 | [86] |
| PP      | 23.2 | 29.4 | 38.6                          | 48.5 | 55.9 | 68.0 | 80.1 | 344    | 20.4 | [86] |
| PET     | 10.5 | 14.2 | 19.5                          | 22.6 | 27.8 | 33.1 | 38.3 | 166    | 9.9  | [86] |
| PETG    | 0.1  | 0.2  | 0.2                           | 0.3  | 0.3  | 0.4  | 0.5  | 2      | 0.1  | [87] |
| Nylon6  | 1.4  | 1.8  | 2.3                           | 3.0  | 3.8  | 4.9  | 6.2  | 23     | 1.4  | [88] |
| Nylon66 | 0.7  | 0.9  | 1.1                           | 1.4  | 1.8  | 2.3  | 2.9  | 11     | 0.7  | [89] |
| PVC     | 12.7 | 15.8 | 21.6                          | 27.8 | 30.6 | 37.4 | 44.2 | 190    | 11.3 | [86] |
| PMMA    | 0.9  | 1.3  | 1.8                           | 2.5  | 2.9  | 3.2  | 4.0  | 17     | 1.0  | [90] |
| PS      | 3.1  | 4.2  | 5.6                           | 7.5  | 10.1 | 13.5 | 18.1 | 62     | 3.7  | [91] |
| HIPS    |      |      | No market data could be found |      |      |      |      |        |      |      |
| PC      | 0.8  | 1.2  | 1.9                           | 2.9  | 3.5  | 4.1  | 4.6  | 19     | 1.1  | [92] |
| ABS     | 1.3  | 2.0  | 3.1                           | 4.6  | 7.0  | 10.6 | 11.4 | 40     | 2.4  | [93] |
| POM     | 0.5  | 0.6  | 0.8                           | 1.0  | 1.3  | 1.7  | 2.1  | 8      | 0.5  | [94] |
| REST    | 12.7 | 18.9 | 24.7                          | 30.6 | 37.4 | 46.4 | 55.3 | 226    | 13.4 | [86] |

\*is the sum of the polymer produced in the years 1990, 1995, 2000, 2005, 2010, 2015 and 2020.
